# Supplementary material for: Complex calcium carbonate aggregates: controlled crystallization and assemblyvia an additive-modified positive-microemulsion-route
Source: Royal Society of Chemistry journal article supplement (doi:10.1039/c1ce05929g), 2011-11-30
Supplement: c1ce05929g.pdf [file c1ce05929g.pdf]

## Supporting Information

# Complex calcium carbonate aggregates: Controlled crystallization and assembly via an additive-modified positive-microemulsion-route

Fangzhi Huang, Shikuo Li, Jimei Song, Long Chen, Xiuzhen Zhang, Yuhua Shen, \*  
Anjian Xie, \*

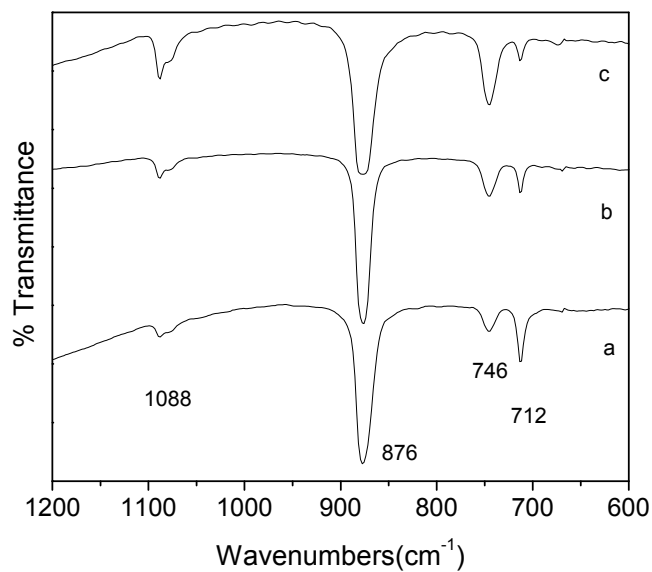

Figure S1 FT-IR spectra of the products obtained in glycine/ microemulsion after reacting for 10 min (a), 30 min (b), and 24 h (c).

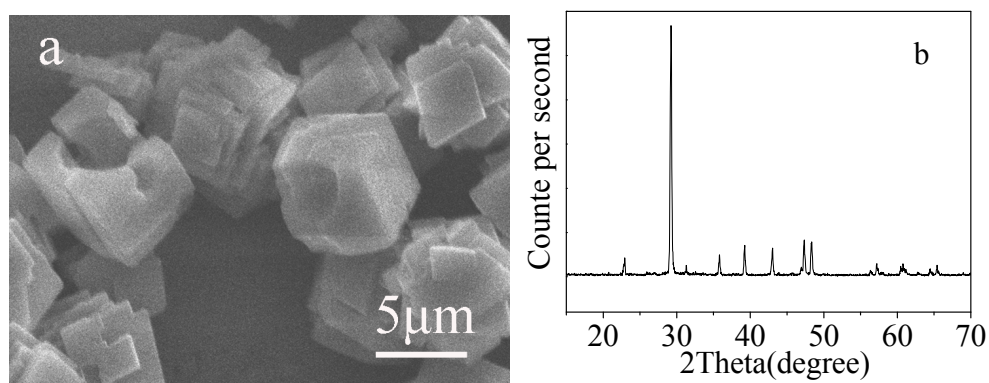

Figure S2 SEM image (a) and X-ray diffraction patterns (b) of CaCO<sub>3</sub> crystals obtained in microemulsion after reacting for 24 h.

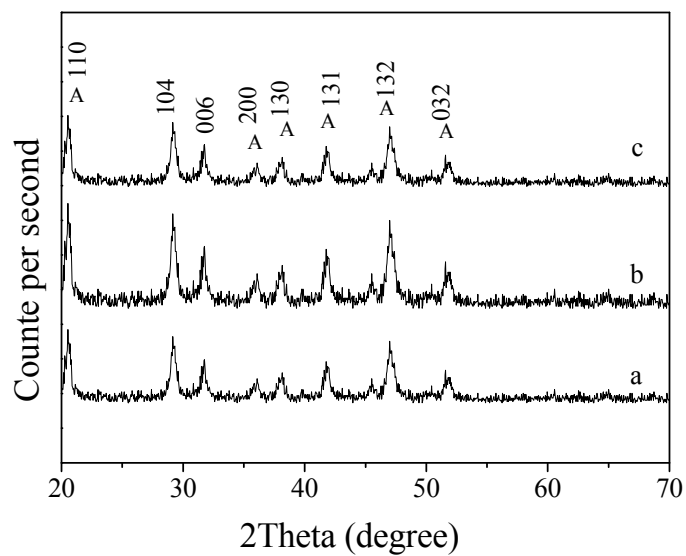

Figure S3 XRD patterns of crystals obtained in dual template (microemulsion/  $Mg^{2+}$ ) after 72h of reaction. ( $Mg^{2+} / Ca^{2+}$ ) (molar ratio): (a) 1, (b) 3, and (c) 4.

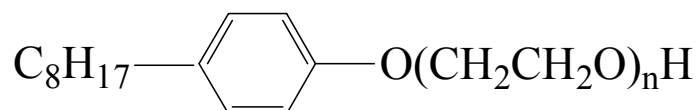

Scheme S1 Possible structural formula of octyl phenyl poly(ethylene Oide)-n (n= 4 or 10)

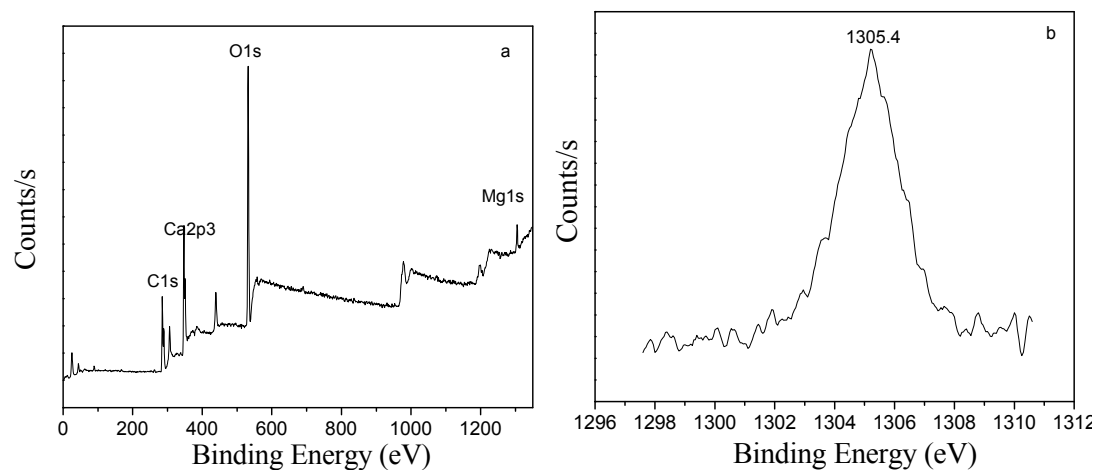

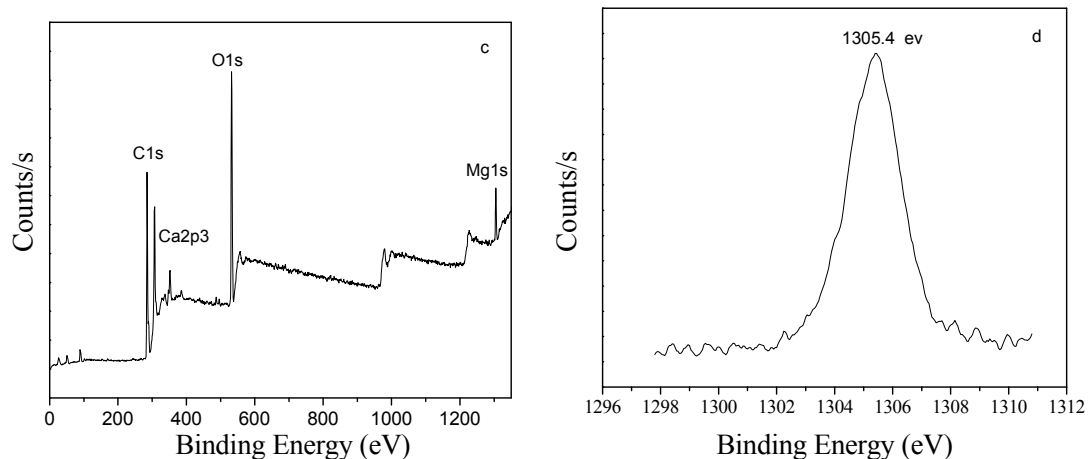

Figure S4 XPS spectra of crystals obtained in dual template (microemulsion /  $\text{Mg}^{2+}$ ) ( $(\text{Mg}^{2+} / \text{Ca}^{2+})$  (molar ratio): a 1; c 4). (a, c) XPS survey scan of the crystals, (b, d) the high-resolution XPS spectrum of particles for Mg). The peaks at 1305.4 eV displayed in Figure S4b and d can be attributed to Mg 1s. The amount of  $\text{Mg}^{2+}$ , determined through XPS quantification, was 3.5 wt % corresponding to sample(a) (figure S4 a), and the 5.23 wt % of  $\text{Mg}^{2+}$  could be coated on the surface of sample(c) (figure S4 c).

Table S1 Percentage content of Mg in the crystals obtained in dual template (microemulsion /  $\text{Mg}^{2+}$ ) ( $(\text{Mg}^{2+} / \text{Ca}^{2+})$  (molar ratio): a 0.025; b 4) determined by ICP-AES measurement.

| Sample | Percentage Content (wt %) |
|--------|---------------------------|
| a      | 5.65                      |
| b      | 6.71                      |
